# Supplementary material for: Li3AlSiO5: the first aluminosilicate as a potential deep-ultraviolet nonlinear optical crystal with the quaternary diamond-like structure
Source: Royal Society of Chemistry journal article supplement (doi:10.1039/c5cp06884c), 2015-12-13

## Electronic Supplementary Information

### **Li<sub>3</sub>AlSiO<sub>5</sub>: The First Aluminosilicate as a Potential Deep-Ultraviolet Nonlinear Optical Crystal with the Quaternary Diamond-like Structure**

Xinglong Chen,<sup>a,b</sup> Fangfang Zhang,<sup>\*,a</sup> Lili Liu,<sup>a,b</sup> Bing-Hua Lei,<sup>a,b</sup> Xiaoyu Dong,<sup>a</sup>  
Zhihua Yang,<sup>\*,a</sup> Hongyi Li,<sup>a,c</sup> Shilie Pan<sup>\*,a</sup>

<sup>a</sup>*Key Laboratory of Functional Materials and Devices for Special Environments,  
Xinjiang Technical Institute of Physics & Chemistry, Chinese Academy of Sciences,  
Xinjiang Key Laboratory of Electronic Information Materials and Devices, No. 40-1,  
South Beijing Road, Urumqi 830011, China*

<sup>b</sup>*University of Chinese Academy of Sciences, Beijing 100049, China*

<sup>c</sup>*Xinjiang Products Quality Supervision & Inspection Institute of Technology, Urumqi  
830011, China*

\*To whom correspondence should be addressed.

E-mail: ffzhang@ms.xjb.ac.cn, zhyang@ms.xjb.ac.cn, slpan@ms.xjb.ac.cn (Shilie Pan);

Phone: (+86)991-3674558, Fax: (+86)991-3838957

## CONTENTS

|                                                                                                                                                                                           |           |
|-------------------------------------------------------------------------------------------------------------------------------------------------------------------------------------------|-----------|
| <b>Table S1.</b> Atomic coordinates, equivalent isotropic displacement parameters and bond valence sums for Li <sub>3</sub> AlSiO <sub>5</sub> .....                                      | <b>S2</b> |
| <b>Table S2.</b> Selected bond distances (Å) and angles (deg.) for Li <sub>3</sub> AlSiO <sub>5</sub> .....                                                                               | <b>S3</b> |
| <b>Table S3.</b> State energies of the lowest conduction band and the highest valence band at same k-points of Li <sub>3</sub> AlSiO <sub>5</sub> calculated by LDA (a) and PBE0 (b)..... | <b>S4</b> |
| <b>Fig. S1.</b> Optical images (a) and observed theoretical morphology (b) of Li <sub>3</sub> AlSiO <sub>5</sub> .....                                                                    | <b>S5</b> |
| <b>Fig. S2.</b> Thermal ellipsoid plot (50% probability) of the asymmetric unit of Li <sub>3</sub> AlSiO <sub>5</sub> .....                                                               | <b>S5</b> |
| <b>Fig. S3.</b> The arrangement of [AlSiO <sub>5</sub> ] <sup>3-</sup> slabs view along the a-axis (a) and the c-axis (b).....                                                            | <b>S5</b> |
| <b>Fig. S4.</b> IR spectrum of Li <sub>3</sub> AlSiO <sub>5</sub> .....                                                                                                                   | <b>S6</b> |
| <b>Fig. S5.</b> UV-Vis-NIR diffuse reflectance spectrum of Li <sub>3</sub> AlSiO <sub>5</sub> .....                                                                                       | <b>S6</b> |
| <b>Fig. S6.</b> TG and DSC curves of Li <sub>3</sub> AlSiO <sub>5</sub> .....                                                                                                             | <b>S6</b> |
| <b>Fig. S7.</b> Calculated band structure of Li <sub>3</sub> AlSiO <sub>5</sub> by DFT (a) and PBE0 (b). .....                                                                            | <b>S7</b> |

**Table S1.** Atomic coordinates ( $\times 10^4$ ), equivalent isotropic displacement parameters ( $\text{\AA}^2 \times 10^3$ ) and bond valence sums (BVS) for  $\text{Li}_3\text{AlSiO}_5$ .  $U(\text{eq})$  is defined as one third of the trace of the orthogonalized  $U_{ij}$  tensor.

| Atoms | Wyck. | $x$      | $y$     | $z$      | $U(\text{eq})$ | BVS  |
|-------|-------|----------|---------|----------|----------------|------|
| Al(1) | $4a$  | 3284(1)  | 7998(1) | 3979(3)  | 7(1)           | 2.75 |
| Li(1) | $4a$  | -3280(7) | 8031(3) | 8970(30) | 13(1)          | 0.97 |
| Li(2) | $4a$  | 6650(6)  | 9960(2) | 8940(30) | 9(1)           | 1.01 |
| Li(3) | $4a$  | 1702(7)  | 956(3)  | 8960(20) | 14(1)          | 0.93 |
| Si(1) | $4a$  | 1668(1)  | 9015(1) | 8945(2)  | 6(1)           | 3.93 |
| O(1)  | $4a$  | 3120(3)  | 9864(1) | 7990(3)  | 9(1)           | 1.91 |
| O(2)  | $4a$  | -1217(4) | 8979(1) | 8034(4)  | 10(1)          | 1.91 |
| O(3)  | $4a$  | 3109(3)  | 8146(1) | 7656(3)  | 10(1)          | 2.00 |
| O(4)  | $4a$  | 1924(4)  | 8904(1) | 2384(4)  | 9(1)           | 2.04 |
| O(5)  | $4a$  | 1454(3)  | 7102(1) | 3097(3)  | 9(1)           | 1.94 |

Table S2. Selected bond lengths (Å) and angles (°) for Li<sub>3</sub>AlSiO<sub>5</sub>.

|                     |            |                       |            |
|---------------------|------------|-----------------------|------------|
| Al(1)-O(5)#1        | 1.749(2)   | O(4)#2-Al(1)-O(3)     | 107.72(10) |
| Al(1)-O(5)          | 1.7533(19) | O(2)-Li(1)-O(5)#9     | 110.9(5)   |
| Al(1)-O(4)#2        | 1.759(2)   | O(2)-Li(1)-O(3)#10    | 114.1(4)   |
| Al(1)-O(3)          | 1.776(3)   | O(5)#9-Li(1)-O(3)#10  | 104.4(4)   |
| Li(1)-O(2)          | 1.892(5)   | O(2)-Li(1)-O(3)#11    | 114.1(4)   |
| Li(1)-O(5)#9        | 1.990(14)  | O(5)#9-Li(1)-O(3)#11  | 103.6(4)   |
| Li(1)-O(3)#10       | 2.033(6)   | O(3)#10-Li(1)-O(3)#11 | 108.8(4)   |
| Li(1)-O(3)#11       | 2.072(6)   | O(1)-Li(2)-O(2)#4     | 116.9(3)   |
| Li(2)-O(1)          | 1.942(5)   | O(1)-Li(2)-O(1)#14    | 107.6(5)   |
| Li(2)-O(2)#4        | 1.952(5)   | O(2)#4-Li(2)-O(1)#14  | 107.0(4)   |
| Li(2)-O(1)#14       | 1.959(14)  | O(1)-Li(2)-O(4)#7     | 109.8(4)   |
| Li(2)-O(4)#7        | 2.062(7)   | O(2)#4-Li(2)-O(4)#7   | 112.0(4)   |
| Li(3)-O(1)          | 1.916(5)   | O(1)#14-Li(2)-O(4)#7  | 102.4(4)   |
| Li(3)-O(2)#12       | 1.969(11)  | O(1)-Li(3)-O(2)#12    | 109.7(4)   |
| Li(3)-O(5)#15       | 2.075(5)   | O(1)-Li(3)-O(5)#15    | 121.8(3)   |
| Li(3)-O(4)#6        | 2.086(6)   | O(2)#12-Li(3)-O(5)#15 | 102.4(3)   |
| Si(1)-O(1)          | 1.597(2)   | O(1)-Li(3)-O(4)#6     | 111.8(3)   |
| Si(1)-O(2)          | 1.599(2)   | O(2)#12-Li(3)-O(4)#6  | 103.3(3)   |
| Si(1)-O(4)          | 1.659(2)   | O(5)#15-Li(3)-O(4)#6  | 106.2(3)   |
| Si(1)-O(3)          | 1.672(2)   | O(1)-Si(1)-O(2)       | 114.70(9)  |
| O(5)#1-Al(1)-O(5)   | 114.14(8)  | O(1)-Si(1)-O(4)       | 109.22(10) |
| O(5)#1-Al(1)-O(4)#2 | 111.39(10) | O(2)-Si(1)-O(4)       | 110.20(11) |
| O(5)-Al(1)-O(4)#2   | 107.69(11) | O(1)-Si(1)-O(3)       | 109.89(11) |
| O(5)#1-Al(1)-O(3)   | 107.52(10) | O(2)-Si(1)-O(3)       | 108.21(10) |
| O(5)-Al(1)-O(3)     | 108.18(10) | O(4)-Si(1)-O(3)       | 104.08(9)  |

Symmetry transformations used to generate equivalent atoms:

|                        |                           |                            |
|------------------------|---------------------------|----------------------------|
| #1 $x+1/2, -y+3/2, z$  | #2 $x, y, z-1$            | #3 $x+1/2, -y+3/2, z-1$    |
| #4 $x+1, y, z$         | #5 $x+1, y, z-1$          | #6 $-x, -y+2, z-1/2$       |
| #7 $-x+1, -y+2, z-1/2$ | #8 $-x+1/2, y-1/2, z-1/2$ | #9 $x-1/2, -y+3/2, z+1$    |
| #10 $x-1, y, z$        | #11 $x-1/2, -y+3/2, z$    | #12 $-x, -y+2, z+1/2$      |
| #13 $x-1, y, z+1$      | #14 $-x+1, -y+2, z+1/2$   | #15 $-x+1/2, y+1/2, z+1/2$ |
| #16 $x, y, z+1$        |                           |                            |

**Table S3** State energies (eV) of the lowest conduction band (L-CB) and the highest valence band (H-VB) at same k-points of  $\text{Li}_3\text{AlSiO}_5$  calculated by LDA **(a)** and PBE0 **(b)**, respectively.

**(a)**

| Compound                    | K-piont                  | H-VB(eV) | L-CB(eV) |
|-----------------------------|--------------------------|----------|----------|
| $\text{Li}_3\text{AlSiO}_5$ | G (0.000, 0.000, 0.000)  | -0.10141 | 6.05443  |
|                             | Z (0.000,0.000, 0.500)   | -0.01463 | 7.85416  |
|                             | T (-0.500, 0.000, 0.500) | -0.23281 | 7.99235  |
|                             | Y (-0.500, 0.000, 0.000) | -0.00719 | 7.63515  |
|                             | S (-0.500,0.500, 0.000)  | -0.01032 | 7.70946  |
|                             | X (0.000,0.500, 0.000)   | -0.11899 | 6.31007  |
|                             | U (0.000,0.500, 0.500)   | 0        | 7.8581   |
|                             | R (-0.500,0.500, 0.500)  | -0.23322 | 7.98436  |

**(b)**

| Compound                    | K-piont                  | H-VB(eV) | L-CB(eV) |
|-----------------------------|--------------------------|----------|----------|
| $\text{Li}_3\text{AlSiO}_5$ | G (0.000, 0.000, 0.000)  | -0.20482 | 7.28592  |
|                             | Z (0.000,0.000, 0.500)   | -0.00524 | 9.0722   |
|                             | T (-0.500, 0.000, 0.500) | -0.23281 | 9.8446   |
|                             | Y (-0.500, 0.000, 0.000) | -0.0521  | 7.63515  |
|                             | S (-0.500,0.500, 0.000)  | -0.05351 | 9.04194  |
|                             | X (0.000,0.500, 0.000)   | -0.19958 | 7.52171  |
|                             | U (0.000,0.500, 0.500)   | 0        | 9.07362  |
|                             | R (-0.500,0.500, 0.500)  | -0.20842 | 9.84183  |

**Fig.S1** (a) Optical images of  $\text{Li}_3\text{AlSiO}_5$  by spontaneous crystallization; (b) Observed theoretical morphology of  $\text{Li}_3\text{AlSiO}_5$ .

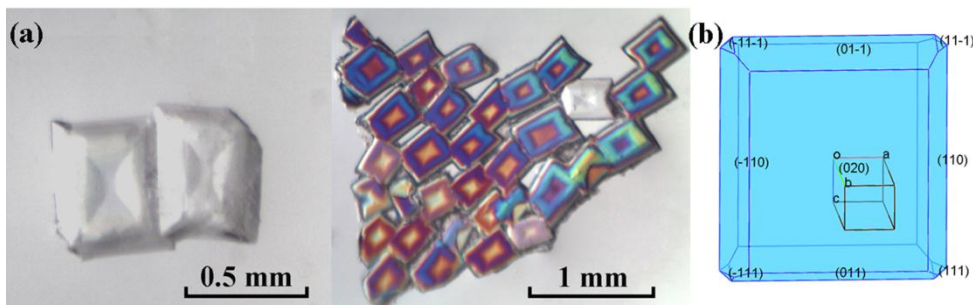

**Fig. S2** Thermal ellipsoid plot (50% probability) of the asymmetric unit of  $\text{Li}_3\text{AlSiO}_5$ .

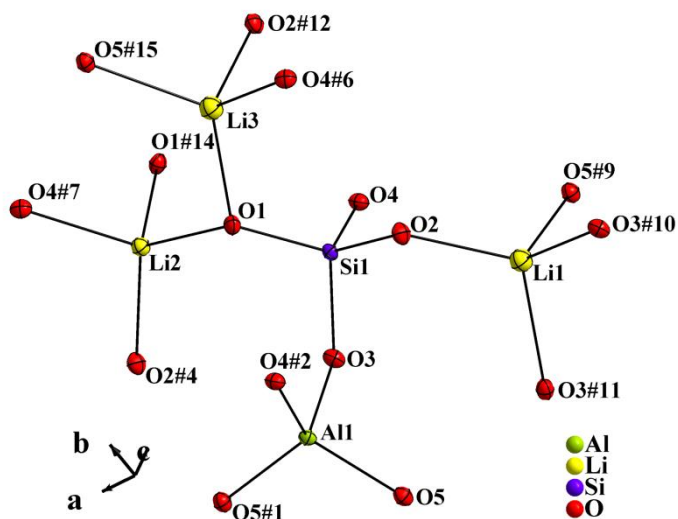

**Fig. S3** The arrangement of  $[\text{AlSiO}_5]^{3-}$  slabs view along the a-axis (a) and the c-axis (b). (The green tetrahedra represent  $\text{AlO}_4$ ; the purple tetrahedra represent  $\text{SiO}_4$ )

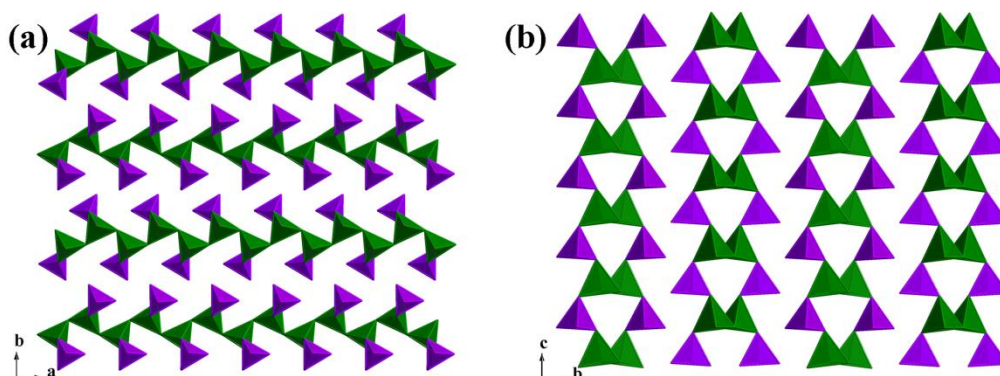

**Fig. S4** IR spectrum of  $\text{Li}_3\text{AlSiO}_5$ .

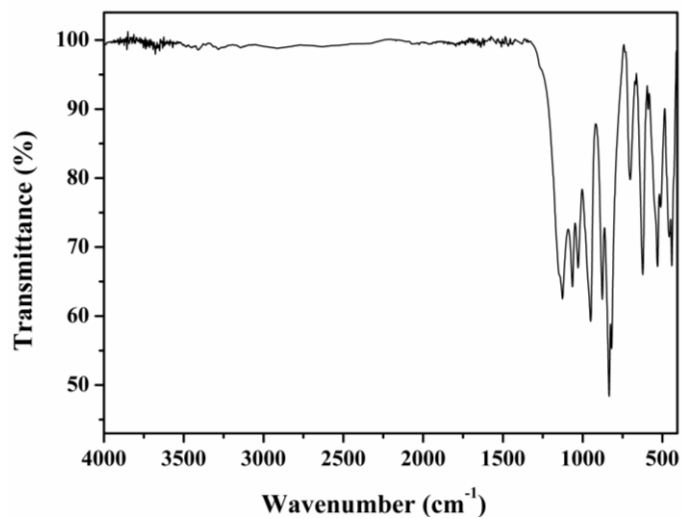

**Fig. S5** UV-Vis-NIR diffuse reflectance spectrum of  $\text{Li}_3\text{AlSiO}_5$ .

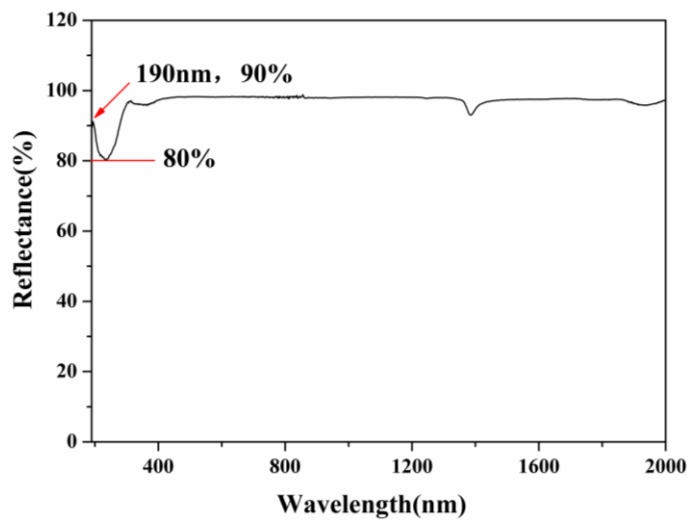

**Fig. S6** TG and DSC curves of  $\text{Li}_3\text{AlSiO}_5$ .

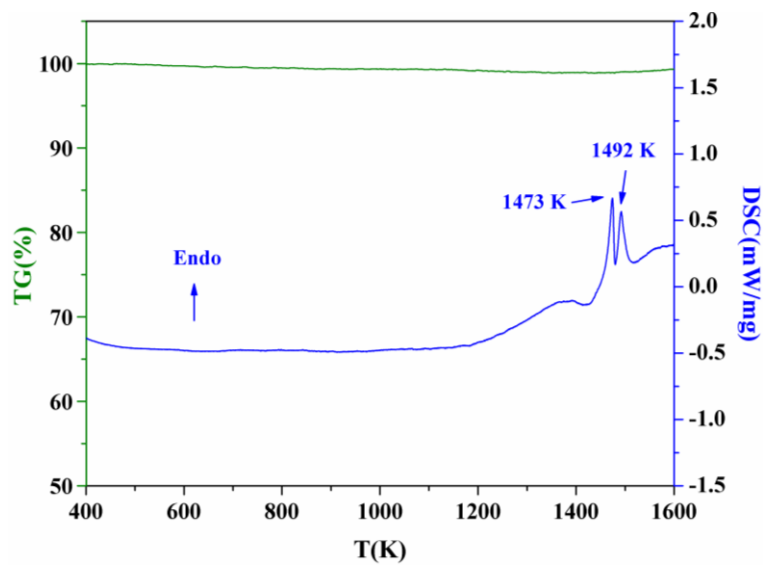

**Fig. S7** Calculated band structure of  $\text{Li}_3\text{AlSiO}_5$  by DFT **(a)** and PBE0 **(b)**.

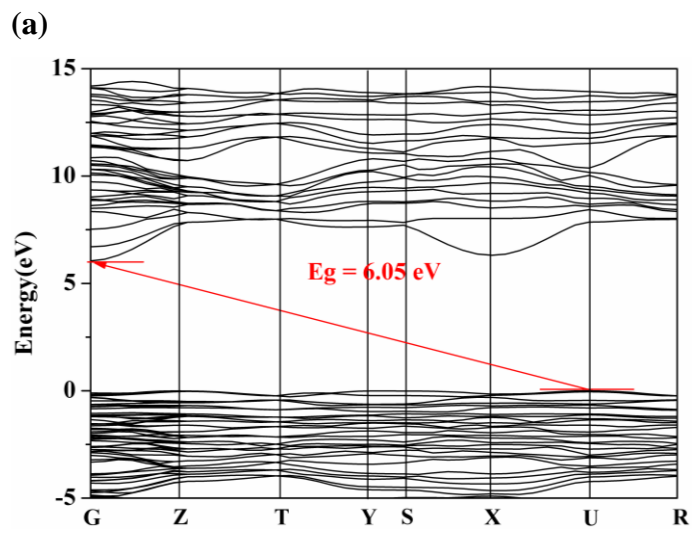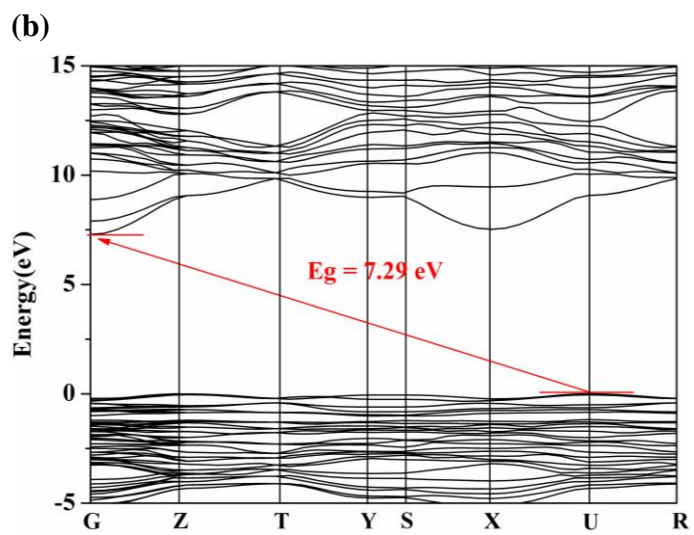

Supplement: c5cp06884c1.pdf [file c5cp06884c1.pdf]
